1 **Ablation of *mpeg+* macrophages exacerbates *mfrp*-related hyperopia**

2

3

4 Zachary J. Brandt<sup>1</sup>, Ross F Collery<sup>2</sup>, Joseph C Besharse<sup>2</sup>, Brian A. Link<sup>1\*</sup>

5

6 <sup>1</sup>*Department of Cell Biology, Neurobiology and Anatomy, Medical College of Wisconsin*

7 <sup>2</sup>*Department of Ophthalmology and Visual Sciences, Medical College of Wisconsin*

8 \*Author for correspondence: [blink@mcw.edu](mailto:blink@mcw.edu)

9

10 **Grant Information:**

11 **Research reported in this publication was supported by the National Eye Institute under**  
12 **award number R01EY29267. This investigation was conducted in a facility constructed**  
13 **with support from Research Facilities Improvement Program, Grant Number**  
14 **C06RR016511, from the National Center for Research Resources, National Institutes of**  
15 **Health.**

16 **ABSTRACT**

17 **PURPOSE:** Proper refractive development of the eye, termed emmetropization, is critical for  
18 focused vision and impacted by both genetic determinants and several visual environment  
19 factors. Improper emmetropization caused by genetic variants can lead to congenital hyperopia,  
20 which is characterized by small eyes and relatively short ocular axial length. To date variants in  
21 only four genes have been firmly associated with human hyperopia, one of which is *MFRP*.  
22 Zebrafish *mfrp* mutants also have hyperopia and similar to reports in mice, exhibit increased  
23 macrophage recruitment to the retina. The goal of this research was to examine the effects of  
24 macrophage ablation on emmetropization and *mfrp*-related hyperopia.

25

26 **METHODS:** We utilized a chemically inducible, cell-specific ablation system to deplete  
27 macrophages in both wild-type and *mfrp* mutant zebrafish. Spectral-domain optical coherence  
28 tomography (SD-OCT) was used to measure components of the eye and determine relative  
29 refractive state. Histology, immunohistochemistry, and transmission electron microscopy was  
30 used to further study the eyes.

31

32 **RESULTS:** While macrophage ablation does not cause significant changes to the relative  
33 refractive state of wild-type zebrafish, macrophage ablation in *mfrp* mutants significantly  
34 exacerbates their hyperopic phenotype.

35

36 **CONCLUSIONS:** Genetic inactivation of *mfrp* leads to hyperopia as well as abnormal  
37 accumulation of macrophages in the retina. Ablation of the mpeg1-positive macrophage  
38 population exacerbates the hyperopia, suggesting that macrophages are recruited in an effort  
39 help preserve emmetropization and ameliorate hyperopia.

40

## 41 **METHODS**

### 42 **Histology and TEM**

43 Eyes were fixed with 1.0% paraformaldehyde, 2.5% glutaraldehyde, 3.0% sucrose, in  
44 0.06 M cacodylate buffer overnight at 4°C. Samples were then washed in cacodylate buffer and  
45 post-fixed with 1% osmium tetroxide and dehydrated by series of methanol washes. Larvae  
46 were infused with Epon 812 resin (Electron Microscopy Sciences) through two 15 minute  
47 acetonitrile washes followed by 1:1 acetonitrile:Epon incubation for 1 hour, and 100% Epon  
48 incubation overnight. Finally, larvae were embedded in 100% Epon and hardened at 65°C for 24  
49 hours. 1µm transverse serial sections through the length of the larvae were cut via microtome  
50 and stained with toluidine blue for light microscopy. Light microscopy images were taken using a  
51 NanoZoomer 2.0-HT (Hamamatsu Photonics K.K.). For TEM analysis 70nm sections were cut,  
52 collected on hexagonal grids and stained with uranyl acetate and lead citrate, followed by  
53 imaging on a Hitachi H-600 electron microscope.

54

### 55 **Paraffin Histology**

56 Eyes utilized for paraffin histology were immersed in 4% paraformaldehyde overnight at  
57 4°C and embedded in paraffin blocks for sectioning. 4µm sections were obtained and stained  
58 with hematoxylin and eosin for analysis, with serial unstained sections used for  
59 immunofluorescent staining. Unstained sections underwent de-paraffinization with xylenes and  
60 an ethanol gradient prior to heated antigen retrieval in antigen retrieval solution (Dako).  
61 Immunofluorescent staining was then performed as follows.

62

### 63 **Immunofluorescence**

64 Whole-mount immunofluorescent staining was performed on dissected eyecups that  
65 were fixed overnight at 4°C in 4% paraformaldehyde. Before whole-mount staining, the lens,

66 cornea, and anterior chamber of the eye was dissected away to allow better access to the  
67 tissue. Retinae were washed in PBS to remove fixative. Standard immunostaining followed with  
68 1-hour incubation in blocking solution (2% normal goat serum, 1% TritonX-100, 1% Tween-20 in  
69 PBS). Larvae were incubated in primary antibodies overnight in blocking solution at room  
70 temperature or 4°C. Embryos were then washed three times for 1 hour in 1% Tween-20 in PBS.  
71 Antibody detection was performed using AlexaFluor (488 and 568) conjugated secondary  
72 antibodies from Invitrogen at 1:800 dilution in blocking solution overnight at 4°C followed by  
73 washes with 1% Tween-20 in PBS.

74 The following primary antibodies and concentrations were utilized:

75 1:200 mouse anti-4C4 (Gift from Peter Hitchcock, University of Michigan)

76 1:500 rabbit anti-Lcp1(L-plastin) (GTX124420, Genetex)

77 1:500 mouse anti-GFP (Takara, JL-8)

78 1:500 rabbit anti-GFP (G10362, ABfinity)

79

## 80 **Spectral Domain – Optical Coherence Tomography (SD-OCT)**

81 Zebrafish eyes were imaged using a Bioptigen Envisu R2200 SD-OCT imaging system  
82 with a 12 mm telecentric lens (Bioptigen, Morrisville, NC) using a Superlum Broadlighter T870  
83 light source centered at 878.4 nm with a 186.3 nm band width (Superlum, Cork, Ireland). Axial  
84 length, lens diameter and retinal radius were measured for populations of zebrafish at 56dpf as  
85 previously described <sup>1</sup>. Both eyes were measured for each fish. In statistical analysis, only the  
86 right eye was utilized.

87

## 88 **Eye and body length measurement**

89 Zebrafish eye dimensions were measured as follows: axial length – front of cornea to  
90 back of RPE; lens diameter – anterior surface of lens to posterior surface; retinal radius – center  
91 of lens to the back of the RPE. Body length was measured from the tip of the head to the end of  
92 the trunk (before the caudal fin). Relative refractive error was calculated as previously  
93 described<sup>1</sup>.

94

### 95 **Metronidazole (MTZ) treatment**

96 All fish used for macrophage ablation experiments were raised under normal conditions  
97 from 0-14dpf. On 14dpf fish were randomly separated into control and experimental groups.  
98 Experimental groups were reared in stationary tanks with 7mM MTZ dissolved in fish facility  
99 water from 6:00pm to 9:00am daily. From 9:00am – 6:00pm fish were returned to the circulating  
100 facility water in 3L tanks for rearing and feeding. From 14dpf – 21dpf fish in the experimental  
101 group were kept in 500mL of MTZ for treatments, while 21dpf and older fish were kept in 1L of  
102 MTZ for treatments. Untreated control groups are also moved to stationary tanks with equivalent  
103 volumes of water during MTZ treatments.

### 104 **Zebrafish**

105 All transgenic and mutant lines were generated and maintained in the ZDR genetic  
106 background. Wild-type siblings or cousins were used as control groups. All animal experiments  
107 were approved by the Institutional Animal Care and Use Committee of the Medical College of  
108 Wisconsin.

109

### 110 **Transgenic Lines and Mutant Lines**

111 *Tg(mpeg1:NTR-eyfp)*<sup>2,3</sup>

112 *Mfrp MW78*<sup>4</sup>

113

114 **INTRODUCTION**

115 Emmetropization is the precise regulation of size, morphology, and relative proportions  
116 of ocular tissues and is critical for proper refraction of light, and thus clear vision. Improper  
117 emmetropization results in either myopia or hyperopia. Myopia is caused by a relative  
118 elongation of the axial length and is the more common and better studied refractive error.  
119 Hyperopia most often occurs when the axial length is too short for the eye's focusing apparatus,  
120 resulting in light culminating behind the retina. Comparatively less is known regarding the  
121 mechanisms of hyperopia.

122 Variants in just a few genes have been associated with hyperopia. Homozygous or  
123 compound heterozygous mutations of *MFRP*, which encodes membrane-type frizzled-related  
124 protein, are associated with microphthalmia, high hyperopia, foveoschisis, areas of retinal  
125 pigmented epithelium (RPE) atrophy, and optic disc drusen in humans<sup>5-13</sup>. Evidence for the  
126 conservation of *MFRP* function comes from multiple animal models. First, two mouse models of  
127 spontaneous retinal degeneration, *rd6* and *rdx*, have identified mutations in *Mfrp* as their  
128 cause<sup>14,15</sup>. While these mutations resulted in retinal degeneration, initial analysis of homozygous  
129 mutants did not find hyperopia. However, examination of the *rd6* model using non-invasive  
130 imaging found that these mice indeed have slight decreases in axial length, and that this effect  
131 could be rescued by gene therapy<sup>16,17</sup>. Our lab utilized zebrafish to investigate the effects of  
132 *mfrp* mutation. In contrast to mice, zebrafish homozygous for *mfrp* mutations do not develop  
133 retinal degeneration, but do recapitulate the pronounced hyperopia seen in humans  
134 homozygous for *MFRP* alterations<sup>4</sup>. These findings illustrate the role of *Mfrp* in proper  
135 emmetropization and its functional conservation across multiple species.

136 While both mouse and zebrafish models display hyperopic phenotypes in the absence of  
137 *Mfrp*, neither model fully recapitulates the full spectrum of human *MFRP*-related phenotypes, as  
138 mice appear to exhibit only small changes in eye size, failing to develop high hyperopia, and  
139 zebrafish mutants do not present photoreceptor degeneration. Intriguingly disruption of *mfrp* in

140 both zebrafish and mice causes accumulation of subretinal macrophages<sup>4,14,18</sup>. Accumulation of  
141 retinal macrophages may also occur in human *MFRP*-related pathology. The presence of round  
142 yellow-white flecks has been documented in patients with *MFRP*-associated microphthalmia<sup>19</sup>.  
143 Under fundus microscopy the subretinal macrophages present in the *Mfrp* mouse models also  
144 share this white fleck appearance<sup>14</sup>. These observations suggest that accumulation of retinal  
145 macrophages is a unified feature of *Mfrp* mutations across species.

146         Based on the accumulation of macrophages seen in two distinct animal models of  
147 *MFRP*-related hyperopia, we hypothesized that retinal macrophages or macrophages within the  
148 eye in general, may function to regulate emmetropization. In order to test this hypothesis, we  
149 utilized established cell-specific ablation techniques in the zebrafish model. We found that while  
150 ablation of macrophages in wild-type fish does not affect basal emmetropization, deletion of this  
151 population exacerbates the hyperopia observed in *mfrp* mutant fish. We also investigated  
152 changes in proliferation, cell death, and scleral collagen fiber morphology of *mfrp* mutant  
153 zebrafish.

154



155 **RESULTS**

156 To address the role of macrophages in emmetropization, we sought to deplete the  
157 macrophage population during ocular growth and assess potential changes in axial length and  
158 refractive error. We chose zebrafish as our model organism as they display a larger shift in  
159 refractive state upon *mfrp* deletion than the *mfrp* mutant mouse models, allowing for easier  
160 detection of phenotypic change<sup>4,17</sup>. For efficient macrophage ablation we used an established  
161 chemical-genetic system<sup>20</sup>. Using macrophage promoter *mpeg1*<sup>2</sup> we expressed bacterial  
162 nitroreductase (NTR) fused to yellow fluorescent protein (eYFP) specifically in macrophages.  
163 Fish carrying this transgene are termed *mpeg1*:NTR-eYFP<sup>+</sup><sup>3</sup>. On its own, NTR expression does  
164 not harm cells; however, it converts the non-toxic prodrug metronidazole (MTZ) into a cytotoxic  
165 metabolite that results in autonomous DNA crosslinking and subsequent cell death. This system  
166 has been effectively utilized for the ablation of multiple cell types in zebrafish<sup>20</sup>.

167

168 **Ablation of macrophages in WT zebrafish does not significantly impact emmetropization**

169 To examine the effects of *mpeg1*<sup>+</sup> cell ablation on emmetropization we allowed  
170 *mpeg1*:NTR-eYFP<sup>+</sup> fish and their non-transgenic wild-type cousins to grow to 8 weeks of age,  
171 or more precisely 56 days post fertilization (dpf), with or without MTZ treatment. MTZ was  
172 administered through daily bath application starting at 14dpf. We chose to start treatment after  
173 14dpf to allow for the normal development and organization of the retina, and to focus solely on  
174 ocular growth as it pertains to eye size and refractive state. Efficient ablation of macrophages in  
175 transgenic fish was confirmed by imaging eYFP expressing cells in retinal flat-mount  
176 preparations, resulting in near complete depletion (Fig. S1A-A''). When fish reached 56dpf they  
177 were anesthetized and imaged via spectral domain optical coherence tomography (SD-OCT) to  
178 measure axial length, lens diameter, and focal length (Fig. 1A), which are used to calculate  
179 refractive error as previously described<sup>1</sup>.

180 MTZ treatment resulted in overall smaller zebrafish, as seen by decreases to axial  
181 length, lens diameter, and body length (Fig. 1B). This was true in both the presence and  
182 absence of *mpeg1:NTR-eYFP* expression, suggesting that MTZ treatment causes  
183 developmental delay or slower overall body growth independent of cell-specific ablation.  
184 Because of this nonspecific effect we standardized axial length measurements to body length,  
185 as well as lens diameter (Fig. 1C). We have previously shown that both of these measurements  
186 correlate linearly with axial length in wild-type fish and can be used for normalization for fish of  
187 different sizes<sup>1</sup>. Statistical analysis by 2-way ANOVA indicated a significant effect of MTZ  
188 treatment on axial length normalized to body length, but no significant interaction with  
189 *mpeg1:NTR-eYFP+* expression; *post hoc* analysis revealed there were not significant  
190 differences between any groups (Fig. 1C). In contrast, 2-way ANOVA of axial length normalized  
191 to lens diameter found a significant interaction between presence of the *mpeg1:NTR-eYFP*  
192 transgene and MTZ treatment suggesting a possible effect of macrophage ablation on relative  
193 eye size. However, the relative eye size of *mpeg1:NTR-eYFP+* fish treated with MTZ was not  
194 statistically different from their *mpeg1:NTR-eYFP+* untreated siblings (Fig. 1C). To more  
195 specifically assess the refractive state of these eyes, we calculated refractive error as previously  
196 described<sup>1</sup>. Again statistical analysis by 2-way ANOVA found a significant interaction between  
197 presence of the *mpeg1:NTR-eYFP* transgene and MTZ treatment. This suggested that  
198 macrophage ablation can affect refractive error, but again *post hoc* multiple comparisons did not  
199 reveal significant differences between groups (Fig. 1D). Taken together these results suggest  
200 that *mpeg+* macrophage ablation does not significantly alter emmetropization in wild-type  
201 zebrafish.

202

### 203 **Macrophage ablation in *mfrp* mutants**

204 While macrophage ablation did not significantly alter the relative refractive error of WT  
205 zebrafish, the previously documented macrophage accumulation in *mfrp* mutants led us to

206 hypothesize that they may still play a role in this pathologic hyperopic state. To evaluate this, we  
207 employed the same macrophage ablation strategy on *mfrp* mutant and heterozygous siblings.  
208 Again, highly efficient ablation of wild-type macrophages was observed by *mpeg1:NTR-eYFP*  
209 expression, as well as using the 4C4 antibody termed 4C4 which labels macrophages and  
210 microglial cells in zebrafish (Fig. 2A-B''', E, F)<sup>21</sup>. While nearly all transgene expressing cells are  
211 depleted, some 4C4+ cells escape ablation likely due to incomplete overlap in expression of the  
212 4C4 antigen and *mpeg1* transgene. As expected, *mfrp* mutant fish showed significant increases  
213 in *mpeg1:NTR-eYFP*+ cells, with focal increases at the central retina (Fig. 2C-C'''). In *mfrp*<sup>-/-</sup>  
214 fish we saw depletion of *mpeg1:NTR-eYFP* expressing cells; however, the effect was not as  
215 complete as in wild-type fish (Fig. 2C, D, E). 4C4 cell counts were not significantly decreased  
216 (Fig. 2C', D', F). While the ablation of our *mpeg1:NTR-eYFP* expressing cells remained efficient  
217 and significant, these results reveal that some macrophages which accumulate in *mfrp*<sup>-/-</sup> eyes  
218 remain.

219  
220 To obtain more detailed spatial information regarding the macrophage accumulation in  
221 *mfrp* mutants, as well as their ablation, we performed immunofluorescent staining on histological  
222 sections. We labeled eYFP+ cells using a GFP antibody and co-stained for lymphocyte cytosolic  
223 protein 1 (Lcp1), as an additional macrophage marker<sup>22</sup>. Nuclei were stained with 4',6-  
224 diamidino-2-phenylindole (DAPI) to identify the retinal layers. In *mfrp*<sup>+/-</sup>; *mpeg1:NTR-eyfp*<sup>+</sup>  
225 untreated control fish, eYFP+ cells are seen sporadically across all layers of the retina. The  
226 ganglion cell layer (GCL) and inner nuclear layer (INL) contain the highest frequency of these  
227 cells, but eYFP+ cells can also be found in the outer nuclear layer (ONL). In control fish nearly  
228 all eYFP+ cells observed are also Lcp1+ (Fig. 3A-B''', I-K, M-O). The strong endogenous  
229 fluorescence of the photoreceptor layer precluded accurate quantitation of eYFP+ cells in the  
230 outer layer; however, Lcp1 staining showed small numbers of macrophages present there as  
231 well (Fig. 3L). MTZ treatment efficiently reduced or completely depleted eYFP+ cells across all

232 layers of *mfrp*<sup>+/-</sup>; *mpeg1*:NTR-eyfp<sup>+</sup> eyes (Fig. 3C-D''', M-O). Though seemingly reduced,  
233 sporadic Lcp1<sup>+</sup> cells remained at slightly higher levels than eYFP<sup>+</sup> cells, revealing that some  
234 macrophages escape ablation. In *mfrp*<sup>-/-</sup>; *mpeg1*:NTR-eyfp<sup>+</sup> untreated eyes, both eYFP<sup>+</sup> and  
235 Lcp1<sup>+</sup> cells were noted across all layers of the retina (Fig. 3E-F'''). However, statistical analysis  
236 showed a significant increase in the frequency of both eYFP<sup>+</sup> and Lcp1<sup>+</sup> cells only in the ONL  
237 (Fig. 3K, O). MTZ treatment was similarly effective in *mfrp*<sup>-/-</sup>; *mpeg1*:NTR-eyfp<sup>+</sup> fish, as eYFP<sup>+</sup>  
238 cells were greatly reduced or completely depleted across all layers of the retina (Fig. 3M-O).  
239 Lcp1<sup>+</sup> cells were also decreased in the INL and ONL (Fig. 3J, K). These data highlight the  
240 efficient ablation of macrophages across all layers of the eye and identify the ONL as the  
241 specific location of increased macrophage presence in *mfrp*<sup>-/-</sup> fish.

242

#### 243 **Macrophage ablation exacerbates hyperopia in *mfrp*<sup>-/-</sup> zebrafish**

244 We again utilized SD-OCT to image and measure the various metrics of *mfrp*<sup>-/-</sup>;  
245 *mpeg1*:NTR-eYFP<sup>+</sup> eyes compared to the eyes of *mfrp*<sup>+/-</sup>; *mpeg1*:NTR-eYFP<sup>+</sup> siblings with  
246 and without MTZ treatment (Fig. 4A). Similar to wild-type fish, MTZ treatment slowed overall  
247 growth in both *mfrp*<sup>+/-</sup>, and *mfrp*<sup>-/-</sup> fish (Fig. 4B, Body Length). This effect was independent of  
248 *mpeg1*:NTR-eYFP expression (Fig S2A-B).

249 As expected, *mfrp*<sup>-/-</sup> fish had significantly reduced relative eye size compared to their  
250 *mfrp*<sup>+/-</sup> siblings, when normalized to either body length or lens diameter as determined by 2-  
251 way ANOVA ( $p < 0.0001$ ) (Fig. 4C). Relative refractive error was also significantly increased in  
252 *mfrp*<sup>-/-</sup> fish compared to *mfrp*<sup>+/-</sup> siblings as previously reported (Fig. 4D)<sup>4</sup>. These results confirm  
253 that loss of *mfrp* leads to hyperopia in zebrafish and reveal that *mpeg*<sup>+</sup> cell ablation does not  
254 rescue this phenotype, but instead appears to exacerbate the hyperopia.

255 To normalize for the overall growth effect of MTZ treatment and determine relative ocular  
256 metrics, we again standardized axial length to both body length and lens diameter. When  
257 assessing the effect of MTZ treatment on relative eye size, we found that MTZ treatment

258 affected the axial length to body length ratio of non-transgene control animals ( $p=0.0043$ , 2-way  
259 ANOVA) (Fig. S2C). While this might suggest a potential nonspecific effect of MTZ treatment on  
260 relative eye size, differences were not observed for axial length relative to lens diameter in  
261 these non-transgenic control fish ( $p=0.3664$ , 2-way ANOVA) (Fig. S2C). Given that body length  
262 does not impact emmetropization, while lens diameter directly impacts this process, we  
263 concluded that MTZ treatment alone does not alter emmetropization in a nonspecific fashion.

264 When we assessed the effect of macrophage ablation on the relative eye size of *mfrp*<sup>+/-</sup>;  
265 *mpeg1*:NTR-eYFP<sup>+</sup> compared to *mfrp*<sup>-/-</sup>; *mpeg1*:NTR-eYFP<sup>+</sup> eyes we found that MTZ  
266 treatment affected relative eye size (Fig. 4C; axial length to lens diameter;  $p<0.0001$ , 2-way  
267 ANOVA). 2-way ANOVA of axial length to lens diameter ratios also revealed a significant  
268 interaction between genotype and MTZ treatment ( $p=0.0158$ ). *post-hoc* analysis confirmed that  
269 *mfrp*<sup>-/-</sup>; *mpeg1*:NTR-eYFP<sup>+</sup> fish had a significantly decreased axial length to lens diameter ratio  
270 compared to their untreated *mfrp*<sup>-/-</sup>; *mpeg1*:NTR-eYFP<sup>+</sup> siblings (Fig. 4C). Again, nonspecific  
271 effects were not observed for axial length relative to lens diameter in animals that lacked the  
272 *mpeg1*:NTR-eYFP transgene ( $p=0.3664$ , 2-way ANOVA) (Fig. S2C), suggesting that the change  
273 in relative eye size in *mfrp*<sup>-/-</sup> fish was specific to *mpeg1*<sup>+</sup> cell ablation.

274 Finally, relative refractive error was also significantly affected by MTZ treatment in  
275 *mpeg*:NTR-eYFP expressing fish (Fig. 4D;  $p<0.0001$ , 2-way ANOVA), but not in non-transgenic  
276 controls ( $p=0.2646$ , 2-way ANOVA). Similar to the changes in axial length relative to lens  
277 diameter, 2-way ANOVA also revealed a significant interaction between genotype and MTZ  
278 treatment ( $p=0.0043$ ). *post-hoc* analysis showed that the reduction in axial length to lens  
279 diameter ratio translated to a significant increase in relative refractive error in *mfrp*<sup>-/-</sup>;  
280 *mpeg1*:NTR-eYFP<sup>+</sup> fish compared to their untreated *mfrp*<sup>-/-</sup> siblings (Fig. 4D). These results  
281 demonstrate that macrophage ablation significantly exacerbates the hyperopic phenotype of  
282 *mfrp* mutant zebrafish, indicating that the accumulation of macrophages seen in *mfrp*-related  
283 hyperopia may be recruited to ameliorate the microphthalmia.

284

285 **Macrophage ablation does not significantly alter retina morphology**

286 *As mpeg1+* cell ablation affected relative eye size and refractive error we sought to gain  
287 possible mechanistic insight into these changes by assessing overall eye and retinal  
288 morphology. We assessed the effects of macrophage ablation on overall retina morphology by  
289 histology. Hematoxylin and eosin-stained paraffin sections revealed normal retinal morphology  
290 following macrophage ablation (Fig. 5A-B'). We did note that MTZ treated eyes displayed more  
291 uniform and dispersed melanin throughout the cells of the RPE (Fig. 5A', B'). The rod outer  
292 segment layer also appears shorter when compared with untreated siblings, possibly due to  
293 contraction of the myoid. These morphological changes are reminiscent of the retinomotor  
294 changes seen in dark adapted zebrafish.

295

296 **Neither proliferation nor cell death underlie exacerbated *mfrp*-related hyperopia after  
297 macrophage ablation.**

298 We hypothesized that the exacerbated changes in relative eye size seen in *mfrp*  
299 mutants could be due to altered cell proliferation and/or death. To assess changes in  
300 proliferation we performed immunohistochemistry for proliferative cell nuclear antigen (PCNA),  
301 along with DAPI to label nuclei. In *mfrp*<sup>+/-</sup>; *mpeg1*:NTR-eYFP<sup>+</sup> eyes, PCNA<sup>+</sup> nuclei are found  
302 frequently within both the INL and ONL, as well as the ciliary marginal zone. In comparison,  
303 *mfrp*<sup>-/-</sup>; *mpeg1*:NTR-eYFP<sup>+</sup> fish have similar PCNA<sup>+</sup> cell frequency within the INL to their  
304 heterozygous siblings, but significantly decreased frequency of PCNA<sup>+</sup> nuclei in the ONL (Fig.  
305 6A-B'', E-F'', I-J). No changes in the ciliary marginal zone were noted under any condition. MTZ  
306 treatment did significantly decrease the percentage of PCNA<sup>+</sup> nuclei in the ONL of *mfrp*<sup>+/-</sup>;  
307 *mpeg1*:NTR-eYFP<sup>+</sup> fish compared to their untreated siblings (Fig. 6C-D'', J). PCNA analysis  
308 also revealed that *mfrp*<sup>-/-</sup> had reduced number of proliferative cells in the ONL, although, MTZ  
309 treatment on *mfrp*<sup>-/-</sup>; *mpeg1*:NTR-eYFP<sup>+</sup> animals did not exacerbate this effect (Fig. 6G-H'', J).

310

311           Alternative to changes cell proliferation, cell death caused by *mpeg*<sup>+</sup> cell ablation could  
312 lead to the decrease in relative eye size observed in *mfrp* mutants. To assess cell death, we  
313 performed terminal deoxynucleotidyl transferase dUTP nick end labeling (TUNEL). We found  
314 little to no TUNEL positive cells regardless of genotype or treatment condition, suggesting that  
315 apoptosis was not causing the altered phenotype in *mfrp* mutant eyes (Fig. S3A-C'''). Consistent  
316 with this result, DAPI staining did not reveal pyknotic nuclei for any genotype.

317

318           These results demonstrate that while macrophage ablation may affect a small number of  
319 proliferative cells in the retina it does not affect apoptosis, and neither cellular process appears  
320 to underlie the exacerbated hyperopia measured in macrophage ablated *mfrp*<sup>-/-</sup> fish.

321

### 322 **Macrophage ablation alters collagen bundle size.**

323           Past research suggests that scleral collagen synthesis, degradation, and crosslinking  
324 play important roles during emmetropization, and this balance is altered during myopia<sup>23,24</sup>. We  
325 hypothesized that collagen fibers in the sclera of *mfrp* mutants may be altered and contribute to  
326 their improper emmetropization. To test this, we imaged collagen fibers in the central posterior  
327 sclera by transmission electron microscopy (TEM). By measuring and plotting the frequency  
328 distribution of collagen fiber diameters in the posterior sclera we see that the posterior scleral  
329 tissue in untreated *mfrp*<sup>-/-</sup>; *mpeg1*:NTR-eYFP<sup>+</sup> fish appears to contain a slightly wider  
330 distribution of collagen bundle sizes with a small increase in the proportion of collagen fibers  
331 with larger diameters compared to their untreated *mfrp*<sup>+/-</sup>; *mpeg1*:NTR-eYFP<sup>+</sup> siblings (Fig. 7A-  
332 B). MTZ treatment exacerbates these differences (Fig. 7C-D). When compared with their  
333 untreated siblings, MTZ treated *mfrp*<sup>+/-</sup>; *mpeg1*:NTR-eYFP<sup>+</sup> fish display a clear shift in collagen  
334 bundle diameter increasing the frequency of smaller collagen bundles and decreasing the  
335 frequency of larger bundles (Fig. 7E). These results suggest that macrophage ablation can

336 affect scleral collagen bundle size. Whether or not these changes in scleral collagens underlie  
337 the exacerbated *mfrp*-related hyperopia upon macrophage ablation is unclear.



338

339 **DISCUSSION**

340 We find that depletion of macrophages exacerbates the *mfrp*-related hyperopia in  
341 zebrafish. Additionally, we observe that while macrophages affect the development of *mfrp*-  
342 related hyperopia, the absence of the *mpeg-1* population does not significantly alter wild-type  
343 emmetropization. We go on to investigate further how macrophage ablation might affect  
344 morphology and growth of retina and sclera, examining changes in retinal cell proliferation as  
345 well as changes to scleral collagen fibers.

346 We noted the nonspecific effects of MTZ treatment on the overall size of the fish and  
347 accounted for these changes in our analysis. MTZ could cause additional non-obvious effects.  
348 MTZ itself is an antibiotic that was originally used for the treatment of trichomoniasis<sup>25,26</sup>, and  
349 continues to be used for combating anaerobic infections<sup>27</sup>. Daily antibiotic washes on zebrafish  
350 likely have a profound effect on the microbiome of the fish and could result in unintended  
351 effects. Metronidazole has also been shown to effect circadian rhythm increasing the expression  
352 of core clock genes in the skeletal muscle of germ-free mice<sup>28</sup>. However, this MTZ based  
353 ablation technique has been used to study circadian rhythms of visual sensitivity in zebrafish  
354 and no alterations to circadian rhythm were reported in non-transgenic MTZ treated fish<sup>29</sup>. To  
355 control for potential nonspecific effects of MTZ, all non-transgenic control groups were treated  
356 exactly as transgene expressing experimental groups and underwent the same MTZ treatment  
357 regimen.

358 Our ablation technique is limited to the cells expressing the *mpeg1:NTR-eYFP*  
359 transgene. In that context, this broad macrophage population is efficiently ablated by the action  
360 of the transgene. Still, 4C4+ macrophages remained following MTZ treatment, suggesting non-  
361 *mpeg+* macrophages persist. Likewise our histological analysis demonstrated *lcp1+*  
362 macrophages can also persist, although at reduced numbers. These findings highlight the  
363 heterogeneity of the population of monocyte-like cells in the retina, whether macrophage or

364 microglia. It is clear that the *mpeg1:NTR-eYFP* transgene, while marking a broad population of  
365 macrophages, does not express in all retinal monocytes. Notably, both *mpeg1* positive and  
366 negative macrophages were elevated in the *mfrp* mutant retina. Future work into the importance  
367 of macrophage sub-types could prove useful for identifying their possible role in  
368 emmetropization, and potential additional effects on *mfrp* mutant pathogenesis. It seems likely  
369 that either the loss of *Mfrp* or the hyperopic condition of the eye alters the state of macrophages  
370 in the retina, possibly leading to activation or recruitment of a separate sub-population.

371         Significantly, we found alteration to scleral collagen fibril size in *mfrp* mutants, as well as  
372 the modulation of collagen fibril size by macrophage ablation. Recent work suggests that  
373 collagen bundle size is dynamically regulated during emmetropization, and these alterations in  
374 size can change their mechanical properties<sup>23</sup>. Recently a change in scleral collagen dynamics  
375 has been partially attributed to an increased presence of scleral macrophages in a visual form-  
376 deprived mouse model of myopia<sup>24</sup>. These investigators report that macrophages appear to be  
377 recruited to the sclera of form-deprived myopic mice by increased scleral expression of c-c motif  
378 chemokine ligand-2 (Ccl2). The authors suggest that upon recruitment the macrophages are  
379 then partially responsible for the secretion of matrix metalloproteinase-2 (Mmp-2) in the sclera,  
380 resulting in extracellular matrix remodeling that contributes to the development of myopia. One  
381 possible hypothesis that stems from these data is that as the retina grows in size it exerts force  
382 on the sclera, and collagen remodeling alters scleral compliance, allowing axial elongation of  
383 the eye. In the case of *mfrp* mutant eyes, increased collagen bundle diameter may result in  
384 increased tensile stiffness of the sclera and prevent proper axial elongation. Indeed, we  
385 observed an upward trend in the percentage of collagen fibrils with larger diameter in *mfrp*<sup>-/-</sup>  
386 sclera when compared to their *mfrp*<sup>+/-</sup> siblings. In further support of these ideas, retinal folds  
387 are observed in *mfrp*<sup>-/-</sup> eyes<sup>4</sup>. Perhaps the retina itself continues to expand while sclera cannot,  
388 and this forces the retina to fold in on itself. This would be of particular relevance to the  
389 foveoschisis seen in some patients with *MFRP*-related microphthalmia. Furthermore, MTZ

390 treatment resulted in a clear shift of collagen fibril diameter distribution in *mfrp*<sup>+/-</sup>; *mpeg1:NTR-*  
391 *eYFP*<sup>+</sup> fish, suggesting that the presence of macrophages can affect collagen fibril size.  
392 Supporting a direct role for macrophages, it has been reported that macrophages have the  
393 ability to directly secrete collagen in the context of scar formation after cardiac injury in  
394 zebrafish<sup>30</sup>. Further work is required to define the precise relationship between collagen fibril  
395 size and emmetropia, as it currently remains unclear if this alteration to scleral collagen in *mfrp*  
396 mutants is an underlying cause of improper refractive state or simply a response.

397 The most significant finding in this study is the role of the *mpeg1*<sup>+</sup> cell population in  
398 pathologic hyperopia, but not for wild-type emmetropization. To date very little is known  
399 regarding the function of ocular macrophages in either normal or aberrant emmetropization. Our  
400 results therefore mark an initial understanding for the role of macrophages in pathologic  
401 hyperopia, and more specifically *mfrp*-related hyperopia in zebrafish.

402

#### 403 **ACKNOWLEDGEMENTS**

404 We thank David Parichy (University of Virginia, Charlottesville) for sharing the *mpeg1:NTR-eyfp*  
405 transgenic line, Clive Wells (Director of the MCW Electron Microscopy core) for assistance with  
406 electron microscopy, and Pat Cliff and Erin Bentley for providing zebrafish husbandry.

407

408 **REFERENCES**

- 409 1. Collery, R. F., Veth, K. N., Dubis, A. M., Carroll, J. & Link, B. A. Rapid, Accurate, and  
410 Non-Invasive Measurement of Zebrafish Axial Length and Other Eye Dimensions Using  
411 SD-OCT Allows Longitudinal Analysis of Myopia and Emmetropization. *PLoS ONE* **9**,  
412 (2014).
- 413 2. Ellett, F., Pase, L., Hayman, J. W., Andrianopoulos, A. & Lieschke, G. J. mpeg1 promoter  
414 transgenes direct macrophage-lineage expression in zebrafish. *Blood* **117**, e49–e56 (2011).
- 415 3. Eom, D. S. & Parichy, D. M. A macrophage relay for long distance signaling during post-  
416 embryonic tissue remodeling. *Science* **355**, 1317–1320 (2017).
- 417 4. Collery, R. F., Volberding, P. J., Bostrom, J. R., Link, B. A. & Besharse, J. C. Loss of  
418 Zebrafish Mfrp Causes Nanophthalmia, Hyperopia, and Accumulation of Subretinal  
419 Macrophages. *Invest. Ophthalmol. Vis. Sci.* **57**, 6805–6814 (2016).
- 420 5. Almoallem, B. *et al.* The majority of autosomal recessive nanophthalmos and posterior  
421 microphthalmia can be attributed to biallelic sequence and structural variants in MFRP and  
422 PRSS56. *Sci. Rep.* **10**, (2020).
- 423 6. Bacci, G. M. *et al.* Novel mutations in MFRP and PRSS56 are associated with posterior  
424 microphthalmos. *Ophthalmic Genet.* **0**, 1–8 (2020).
- 425 7. Crespí, J. *et al.* A Novel Mutation Confirms MFRP as the Gene Causing the Syndrome of  
426 Nanophthalmos–Reninitis Pigmentosa–Foveoschisis–Optic Disk Drusen. *Am. J. Ophthalmol.*  
427 **146**, 323–328.e1 (2008).
- 428 8. Guo, C. *et al.* Detection of Clinically Relevant Genetic Variants in Chinese Patients With  
429 Nanophthalmos by Trio-Based Whole-Genome Sequencing Study. *Invest. Ophthalmol. Vis.*  
430 *Sci.* **60**, 2904–2913 (2019).

- 431 9. Katoh, M. Molecular Cloning and Characterization of MFRP, a Novel Gene Encoding a  
432 Membrane-Type Frizzled-Related Protein. *Biochem. Biophys. Res. Commun.* **282**, 116–123  
433 (2001).
- 434 10. Matsushita, I., Kondo, H. & Tawara, A. Novel compound heterozygous mutations in the  
435 MFRP gene in a Japanese patient with posterior microphthalmos. *Jpn. J. Ophthalmol.* **56**,  
436 396–400 (2012).
- 437 11. Sundin, O. H. *et al.* Extreme hyperopia is the result of null mutations in MFRP, which  
438 encodes a Frizzled-related protein. *Proc. Natl. Acad. Sci.* **102**, 9553–9558 (2005).
- 439 12. Wasmann, R. A. *et al.* Novel membrane frizzled-related protein gene mutation as cause of  
440 posterior microphthalmia resulting in high hyperopia with macular folds. *Acta Ophthalmol.*  
441 *(Copenh.)* **92**, 276–281 (2014).
- 442 13. Zenteno, J. C., Buentello-Volante, B., Quiroz-González, M. A. & Quiroz-Reyes, M. A.  
443 Compound heterozygosity for a novel and a recurrent MFRP gene mutation in a family with  
444 the nanophthalmos-retinitis pigmentosa complex. *Mol. Vis.* **15**, 1794–1798 (2009).
- 445 14. Fogerty, J. & Besharse, J. C. 174delG Mutation in Mouse MFRP Causes Photoreceptor  
446 Degeneration and RPE Atrophy. *Invest. Ophthalmol. Vis. Sci.* **52**, 7256–7266 (2011).
- 447 15. Won, J. *et al.* Membrane Frizzled Related Protein is necessary for the normal development  
448 and maintenance of photoreceptor outer segments. *Vis. Neurosci.* **25**, 563–574 (2008).
- 449 16. Krebs, M. P., Hicks, W. & Nishina, P. M. Mfrp regulates ocular growth in mice and interacts  
450 with Prss56. *Invest. Ophthalmol. Vis. Sci.* **57**, 3609–3609 (2016).
- 451 17. Velez, G. *et al.* Gene Therapy Restores Mfrp and Corrects Axial Eye Length. *Sci. Rep.* **7**,  
452 (2017).

- 453 18. Fogerty, J. & Besharse, J. C. Subretinal infiltration of monocyte derived cells and  
454 complement misregulation in mice with AMD-like pathology. *Adv. Exp. Med. Biol.* **801**,  
455 355–363 (2014).
- 456 19. Zenteno, J. C., Buentello-Volante, B., Quiroz-González, M. A. & Quiroz-Reyes, M. A.  
457 Compound heterozygosity for a novel and a recurrent MFRP gene mutation in a family with  
458 the nanophthalmos-retinitis pigmentosa complex. *Mol. Vis.* **15**, 1794–1798 (2009).
- 459 20. Curado, S., Stainier, D. Y. R. & Anderson, R. M. Nitroreductase-mediated cell/tissue  
460 ablation in zebrafish: a spatially and temporally controlled ablation method with applications  
461 in developmental and regeneration studies. *Nat. Protoc.* **3**, 948–954 (2008).
- 462 21. Becker, T. & Becker, C. G. Regenerating descending axons preferentially reroute to the gray  
463 matter in the presence of a general macrophage/microglial reaction caudal to a spinal  
464 transection in adult zebrafish. *J. Comp. Neurol.* **433**, 131–147 (2001).
- 465 22. Redd, M. J., Kelly, G., Dunn, G., Way, M. & Martin, P. Imaging macrophage chemotaxis in  
466 vivo: Studies of microtubule function in zebrafish wound inflammation. *Cell Motil.* **63**, 415–  
467 422 (2006).
- 468 23. Ouyang, X. *et al.* The collagen metabolism affects the scleral mechanical properties in the  
469 different processes of scleral remodeling. *Biomed. Pharmacother.* **118**, 109294 (2019).
- 470 24. Zhao, F. *et al.* Up-Regulation of Matrix Metalloproteinase-2 by Scleral Monocyte-Derived  
471 Macrophages Contributes to Myopia Development. *Am. J. Pathol.* **190**, 1888–1908 (2020).
- 472 25. Nicol, C. S., Barrow, J. & Redmond, A. Flagyl (8823 R.P.) in the Treatment of  
473 Trichomoniasis. *Sex. Transm. Infect.* **36**, 152–153 (1960).
- 474 26. Watt, L. & Jennison, R. F. Clinical Evaluation of Metronidazole. *Br. Med. J.* **2**, 902–905  
475 (1960).

- 476 27. Löfmark, S., Edlund, C. & Nord, C. E. Metronidazole Is Still the Drug of Choice for  
477 Treatment of Anaerobic Infections. *Clin. Infect. Dis.* **50**, S16–S23 (2010).
- 478 28. Manickam, R., Oh, H. Y. P., Tan, C. K., Paramalingam, E. & Wahli, W. Metronidazole  
479 Causes Skeletal Muscle Atrophy and Modulates Muscle Chronometabolism. *Int. J. Mol. Sci.*  
480 **19**, 2418 (2018).
- 481 29. Li, X. *et al.* Pineal Photoreceptor Cells Are Required for Maintaining the Circadian Rhythms  
482 of Behavioral Visual Sensitivity in Zebrafish. *PLOS ONE* **7**, e40508 (2012).
- 483 30. Simões, F. C. *et al.* Macrophages directly contribute collagen to scar formation during  
484 zebrafish heart regeneration and mouse heart repair. *Nat. Commun.* **11**, 1–17 (2020).
- 485

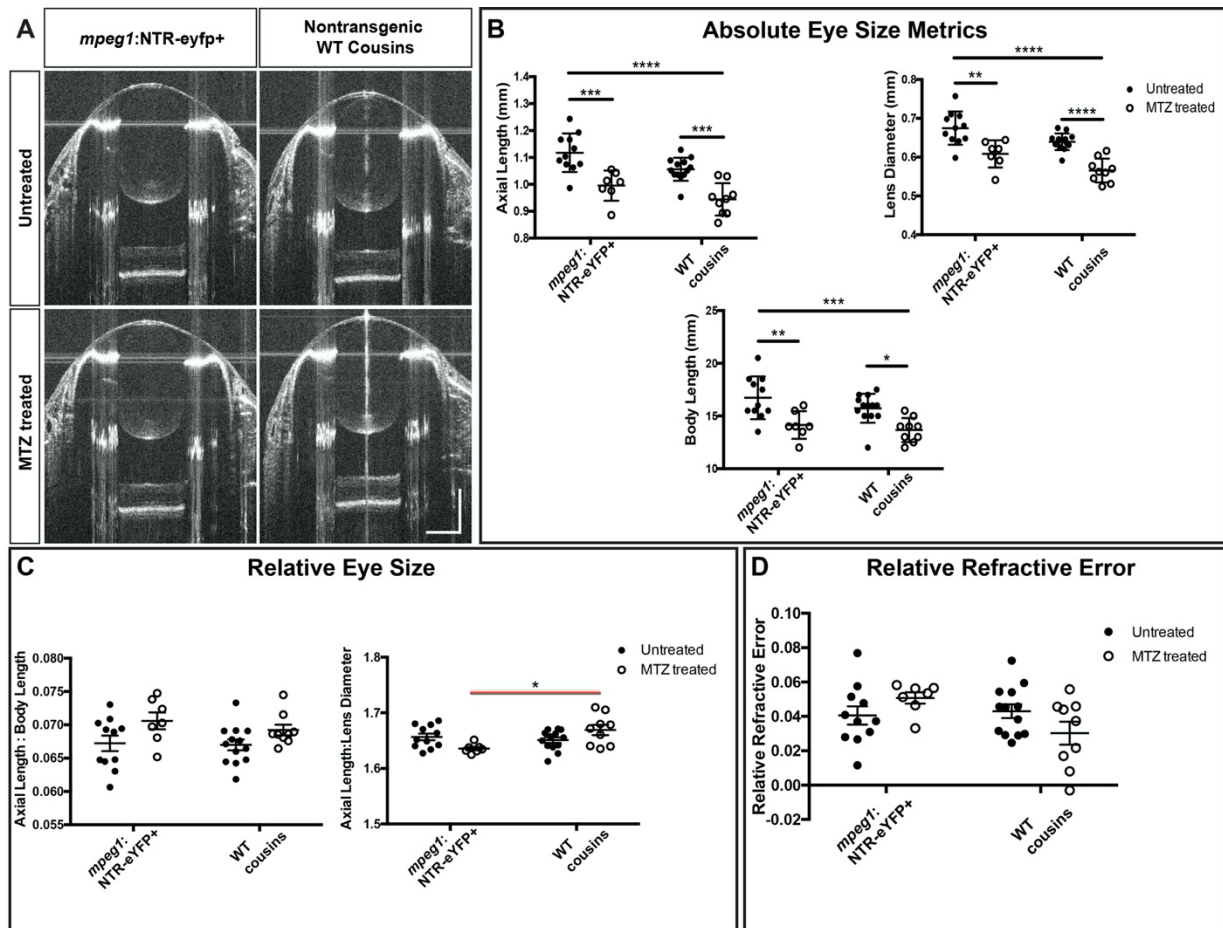

**Figure 1. Ablation of macrophages in WT zebrafish does not significantly impact**

**emmetropization. (A)** Representative SD-OCT B-scans from the center of *mpeg1:NTR-eYFP+* eyes and their WT cousins with or without MTZ treatment. **(B)** Axial length, Body length, and Lens diameter of *mpeg1:NTR-eYFP+* fish and their WT cousins with or without MTZ treatment. **(C)** Axial length normalized to Body length and Lens Diameter. **(D)** Relative Refractive error. 2-way ANOVA was used for statistical analysis for B-D with p-values shown from Tukey's multiple comparisons for *post hoc* analysis. Red bars indicate statistical significance likely due to *mpeg1+* cell ablation. \* =  $p < 0.05$ , \*\* =  $p < 0.01$ , \*\*\* =  $p < 0.001$ , \*\*\*\* =  $p < 0.0001$ .



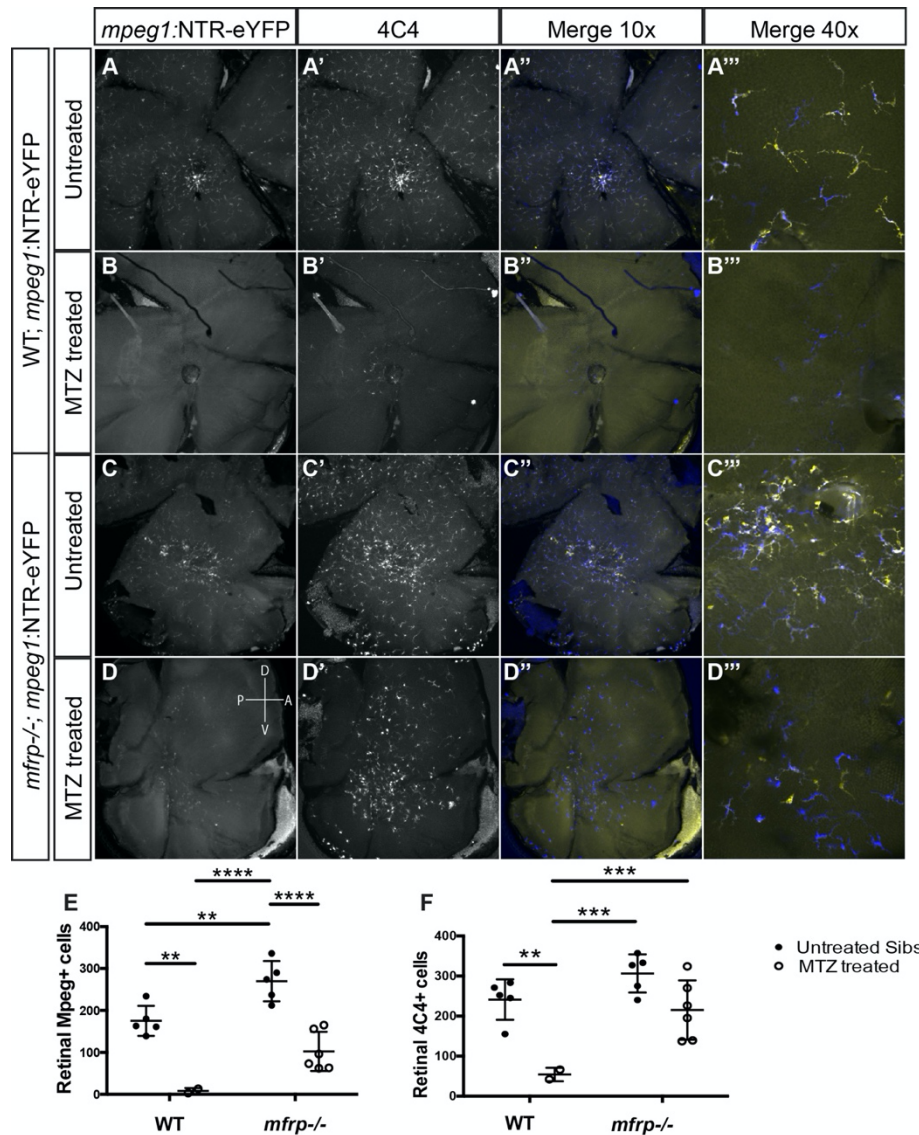

**Figure 2. Efficient macrophage ablation in the *mfrp* retina. (A-D) *mpeg1*:NTR-eYFP expression in WT and *mfrp*<sup>-/-</sup> retina flat-mount preparations with and without MTZ treatment. (A'-D') Immune staining for 4C4 antibody marking macrophages. (A''-D'') Merged and colored images of A-D' with blue representing 4C4 and yellow representing YFP. (A'''-D''') Higher magnification images of A''-D'''. (E, F) Cell counts of *mpeg1*:NTR-eYFP+ cells (E) or 4C4+ cells (F) in WT and *mfrp*<sup>-/-</sup> retina flat-mount preparations with and without MTZ treatment. 2-way ANOVA was used for statistical analysis. Sidak's multiple comparisons for post hoc analysis. \* =  $p < 0.05$ , \*\* =  $p < 0.01$ , \*\*\* =  $p < 0.001$ , \*\*\*\* =  $p < 0.0001$ .**

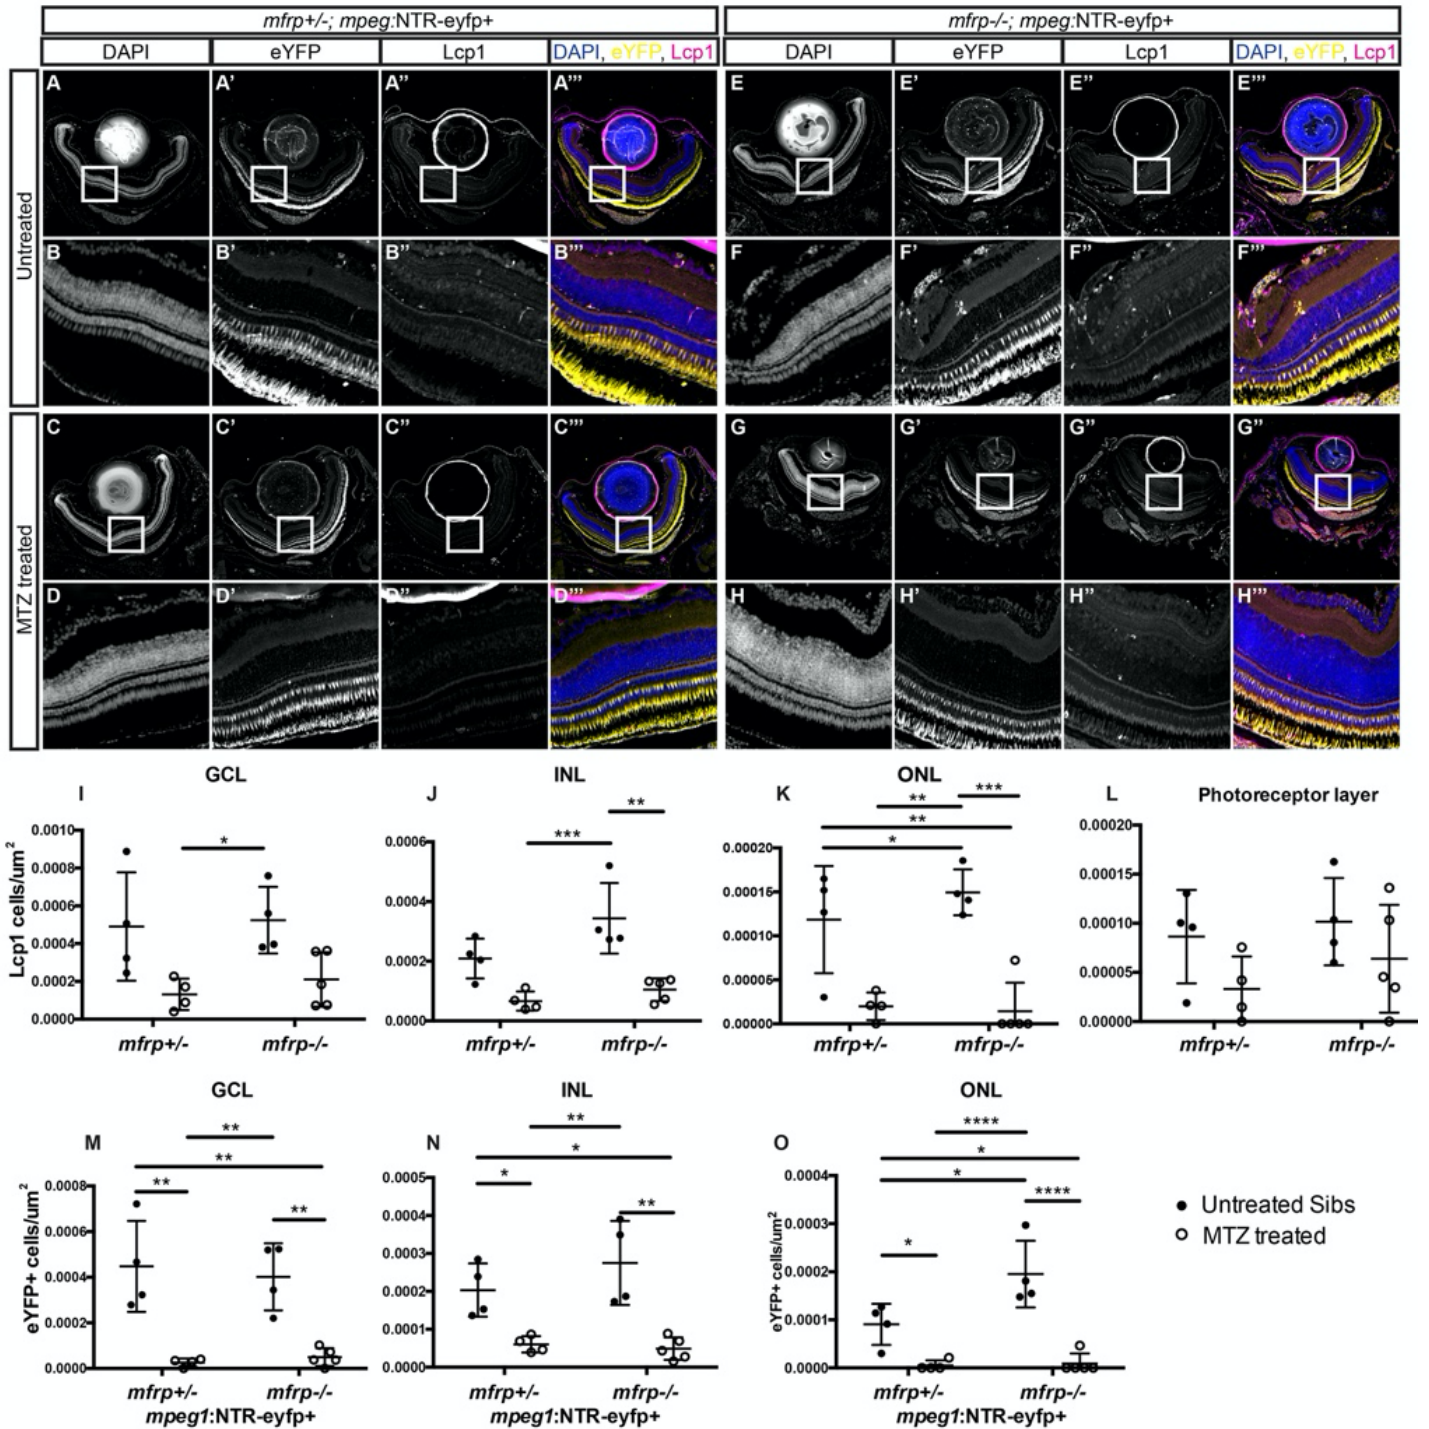

**Figure 3. Distribution of macrophage accumulation and ablation across *mfrp*<sup>+/-</sup>; and *mfrp*<sup>-/-</sup> retinæ. (A-H)** Representative images of central retina sections from *mfrp*<sup>+/-</sup>; *mpeg1*:NTR-eYFP+ and *mfrp*<sup>-/-</sup>; *mpeg1*:NTR-eYFP+ MTZ treated and untreated fish. (A-H)

Grayscale DAPI images at low (A, C, E, G) and high magnification (B, D, F, H). (A'-H')

Grayscale eYFP images at low (A', C', E', G') and high magnification (B', D', F', H'). (A''-H'')

Grayscale Lcp1 images at low (A'', C'', E'', G'') and high magnification (B'', D'', F'', H'').

Colorized merged images with DAPI in blue, eYFP in yellow, and Lcp1 in magenta; images are

at low (A''', C''', E''', G''') and high magnification (B''', D''', F''', H'''). **(I-L)** Quantification of the

number of Lcp1+ cells per  $\mu\text{m}^2$  in the ganglion cell layer (I), inner (J) and outer (K) nuclear layer,

and photoreceptor layer (L). **(M-O)** Quantification of the number of eYFP+ cells per  $\mu\text{m}^2$  in the

ganglion cell layer (M), inner (N) and outer (O) nuclear layer; error bars = standard deviation. 2-

way ANOVA was used for statistical analysis for I-O with p-values shown from Tukey's multiple

comparisons for *post hoc* analysis. \* =  $p < 0.05$ , \*\* =  $p < 0.01$ , \*\*\* =  $p < 0.001$ , \*\*\*\* =  $p < 0.0001$ .

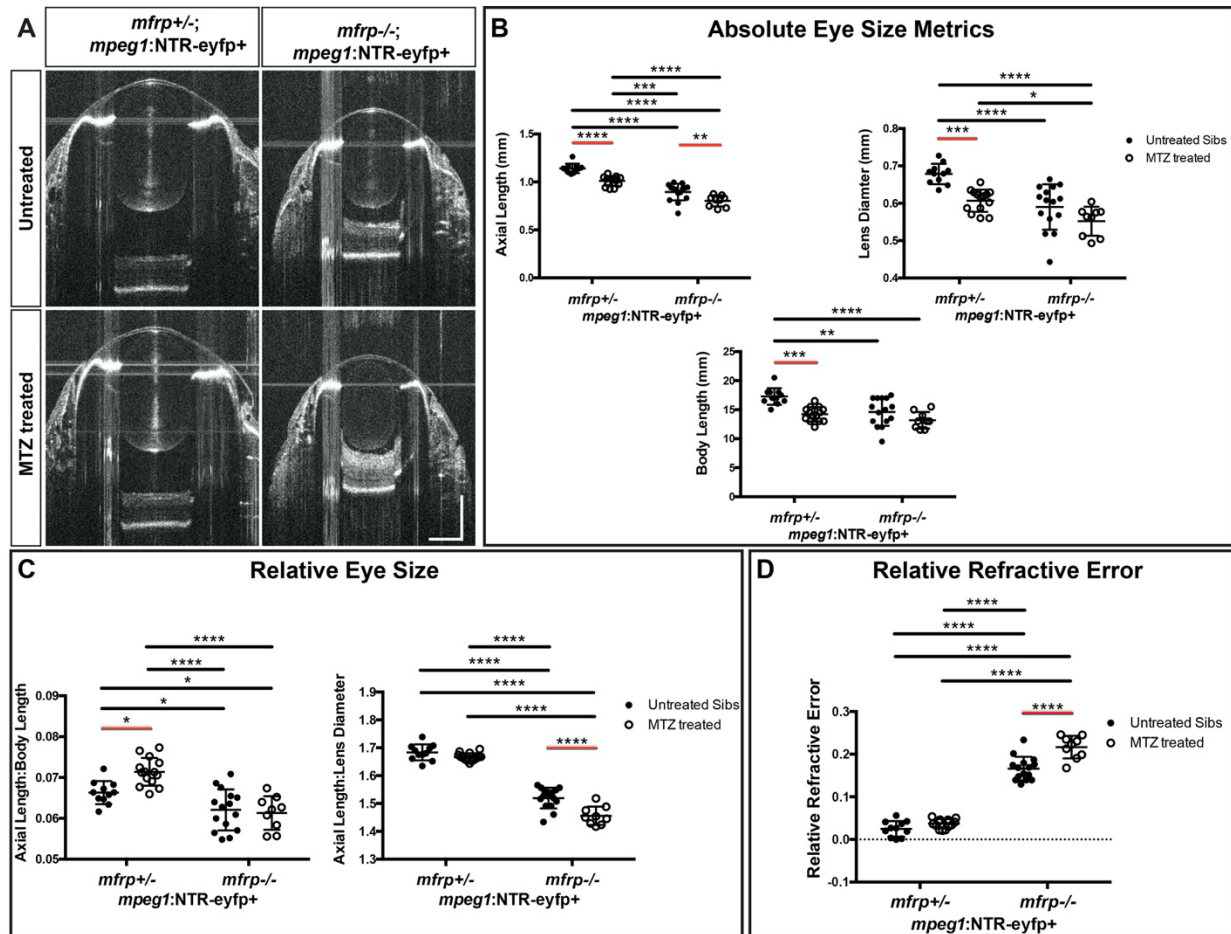

**Figure 4. Macrophage ablation exacerbates hyperopia in *mfrp*<sup>-/-</sup> zebrafish. (A)**

Representative SD-OCT B-scans from the center of *mfrp*<sup>+/-</sup>;*mpeg1*:NTR-eYFP<sup>+</sup> eyes and their *mfrp*<sup>-/-</sup>;*mpeg1*:NTR-eYFP<sup>+</sup> siblings with or without MTZ treatment. **(B)** Eye size metrics of *mfrp*<sup>+/-</sup>;*mpeg1*:NTR-eYFP<sup>+</sup> and *mfrp*<sup>-/-</sup>;*mpeg1*:NTR-eYFP<sup>+</sup> fish with or without MTZ treatment. **(C)** Axial length normalized to Body length and Lens Diameter. **(D)** Relative Refractive error. 2-way ANOVA was used for statistical analysis with p-values shown from Tukey's multiple comparisons for *post hoc* analysis. Error bars = standard deviation. Red bars indicate statistical significance due to MTZ treatment. \* = p<0.05, \*\* = p<0.01, \*\*\* = p<0.001, \*\*\*\* = p<0.0001.

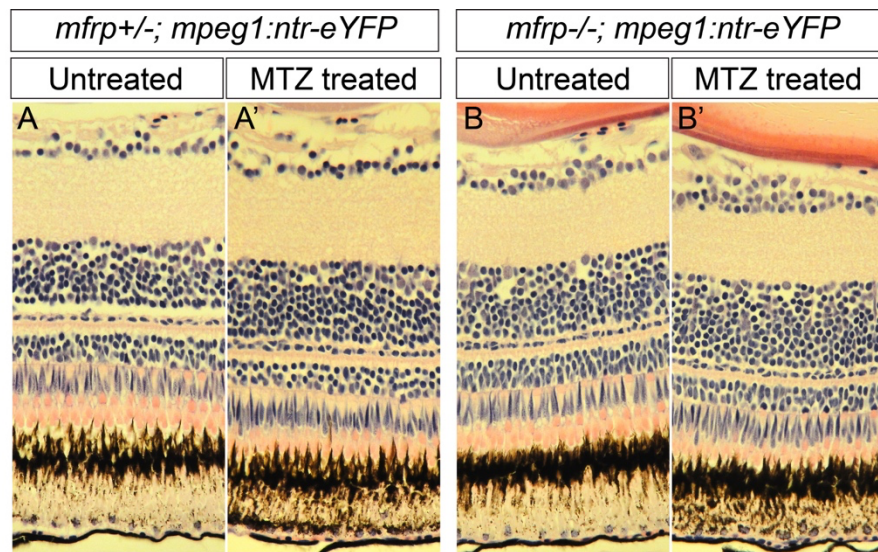

**Figure 5. Macrophage ablation does not significantly alter retina morphology. (A-B')** H&E stained paraffin histology of the central retina in *mfrp*<sup>+/-</sup>; *mpeg1:NTR-eYFP*<sup>+</sup> (A-A'), and *mfrp*<sup>-/-</sup>; *mpeg1:NTR-eYFP*<sup>+</sup> (B-B') with and without MTZ treatment.

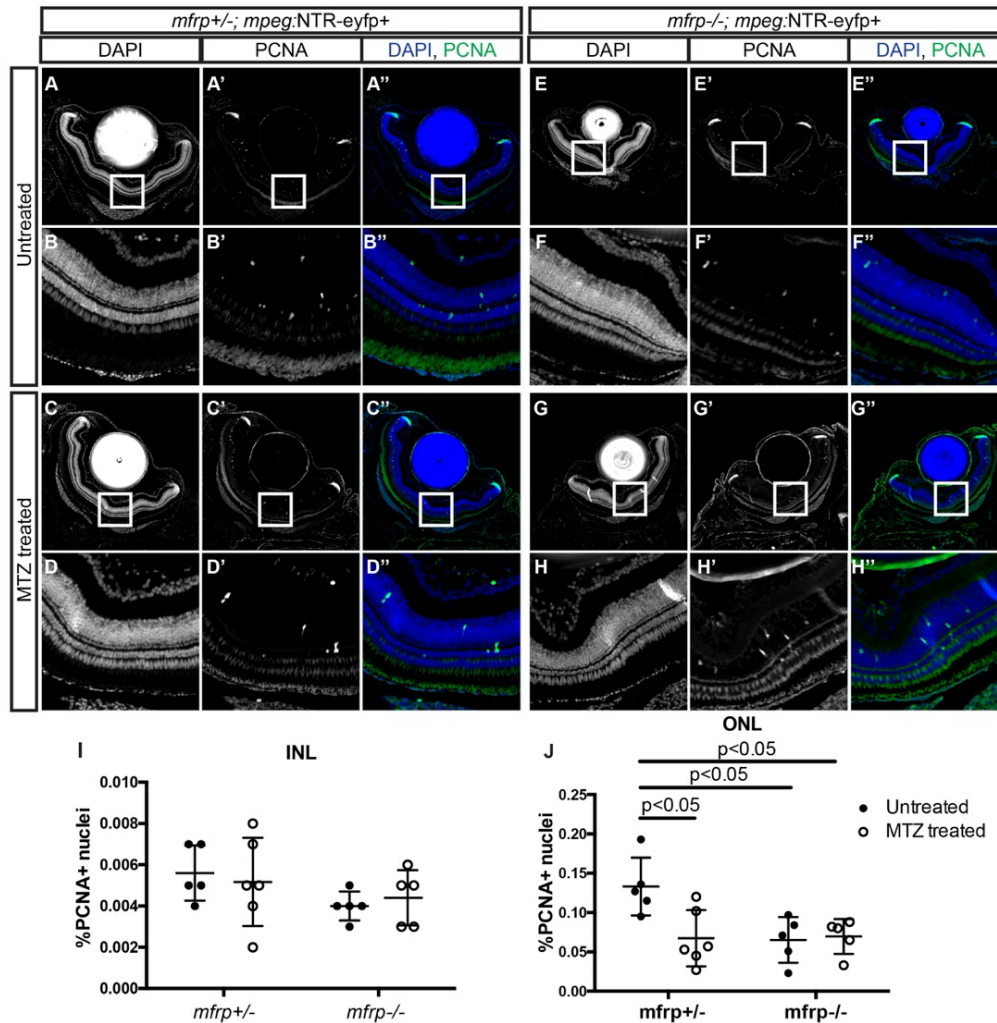

**Figure 6. Proliferative effects of *mfrp* deletion and macrophage ablation. (A-H)**

Representative images of central retina sections from *mfrp+/-; mpeg1:NTR-eYFP+* and *mfrp-/-; mpeg1:NTR-eYFP+* MTZ treated and untreated fish. (A-H) Grayscale DAPI images at low (A, C, E, G) and high magnification (B, D, F, H). (A'-H') Grayscale PCNA images at low (A', C', E', G') and high magnification (B', D', F', H'). (A''-H'') Colorized merged images with DAPI in blue and PCNA in green; images are at low (A'', C'', E'', G'') and high magnification (B'', D'', F'', H''). (I-J) Quantification of the percentage of PCNA+ nuclei in the inner (I) and outer (J) nuclear layer; error bars = standard deviation. 2-way ANOVA was used for statistical analysis for I, J with p-values shown from Tukey's multiple comparisons for *post hoc* analysis.

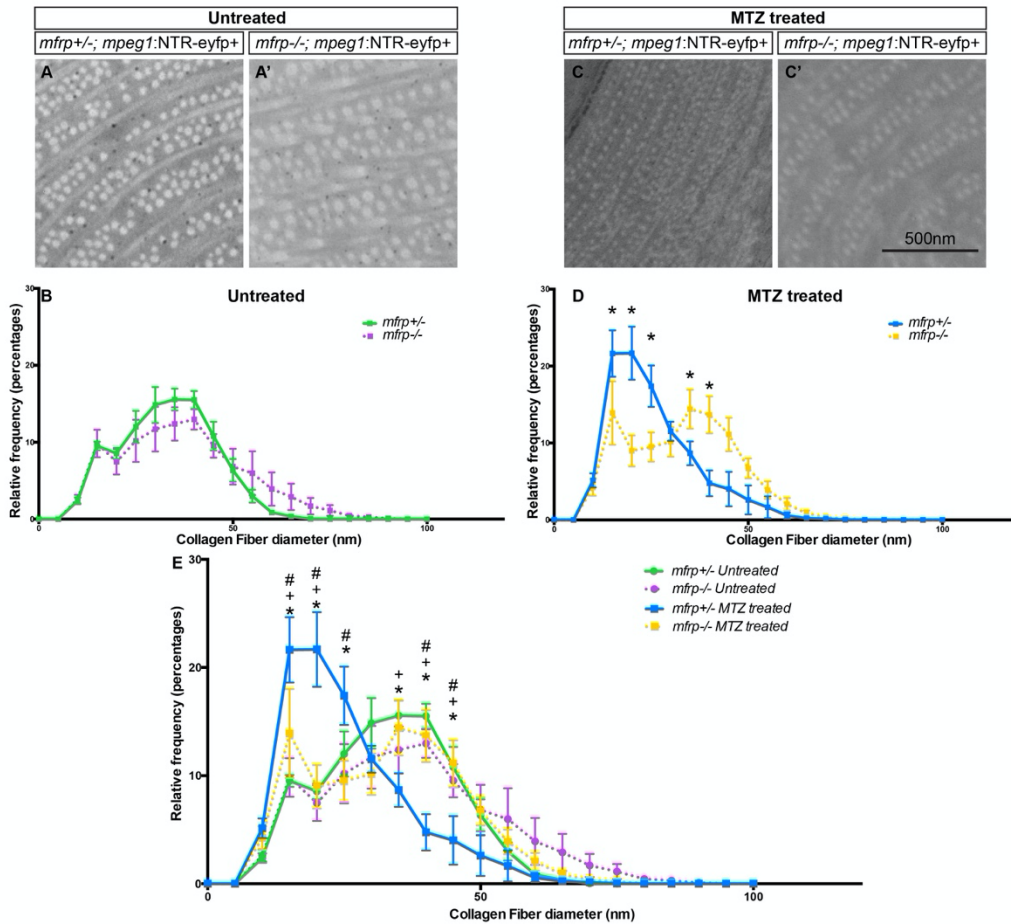

**Figure 7. Collagen Fibril Diameter in *mfrp*<sup>+/-</sup> and *mfrp*<sup>-/-</sup> sclera with and without macrophage ablation** (A) Representative examples of collagen fibrils in the central posterior sclera of *mfrp*<sup>+/-</sup>; *mpeg1*:NTR-eYFP+ (A) and *mfrp*<sup>-/-</sup>; *mpeg1*:NTR-eYFP+ (A') untreated fish. (B) Frequency distribution of collagen fiber diameter with y-axis = relative frequency as a percentage and x-axis = collagen fiber diameter in 5nm bins. *mfrp*<sup>+/-</sup> = green line, *mfrp*<sup>-/-</sup> = purple line. *mfrp*<sup>+/-</sup> n=3; *mfrp*<sup>-/-</sup> n=4. (C) Representative examples of collagen fibrils in the central posterior sclera of *mfrp*<sup>+/-</sup>; *mpeg1*:NTR-eYFP+ (C) and *mfrp*<sup>-/-</sup>; *mpeg1*:NTR-eYFP+ (C') MTZ treated fish. (D) Frequency distribution of collagen fiber diameter with y-axis = relative frequency as a percentage and x-axis = collagen fiber diameter in 5nm bins. *mfrp*<sup>+/-</sup> = blue line, *mfrp*<sup>-/-</sup> = yellow line. *mfrp*<sup>+/-</sup> n=5; *mfrp*<sup>-/-</sup> n=5. Multiple t-tests used for statistical analysis. \* denotes significance of p<0.001. (E) Combined graph of (B) and (D). Errors bars = standard deviation throughout figure. 2-Way ANOVA with Tukey Multiple comparisons used for statistical

analysis. \* denotes significant difference between *mfrp*<sup>+/-</sup> MTZ treated and *mfrp*<sup>-/-</sup> MTZ treated, + denotes significant difference between *mfrp*<sup>+/-</sup> MTZ treated and *mfrp*<sup>+/-</sup> Untreated, and # denotes significant difference between *mfrp*<sup>+/-</sup> MTZ treated and *mfrp*<sup>-/-</sup> Untreated.  $p < 0.05$  for all significant differences in E.



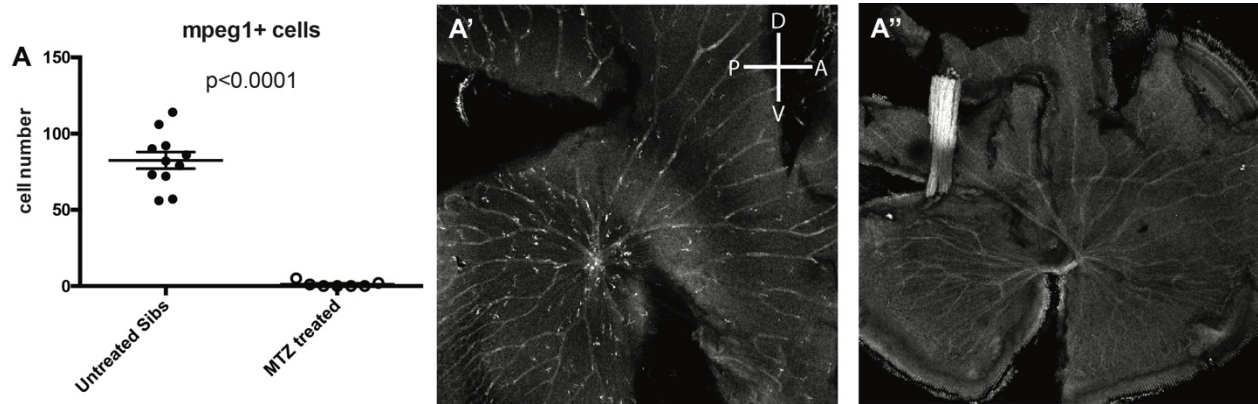

**Figure S1. Efficient ablation of macrophages in WT eyes (A)** Number of *mpeg1*:NTR-eYFP+ cells identified in the retina with and without MTZ treatment. **(A',A'')** Representative images of *mpeg1*:NTR-eYFP+ retina flatmounts with(A') or without(A'') MTZ treatment. Unpaired t-test was used for statistical analysis in A.

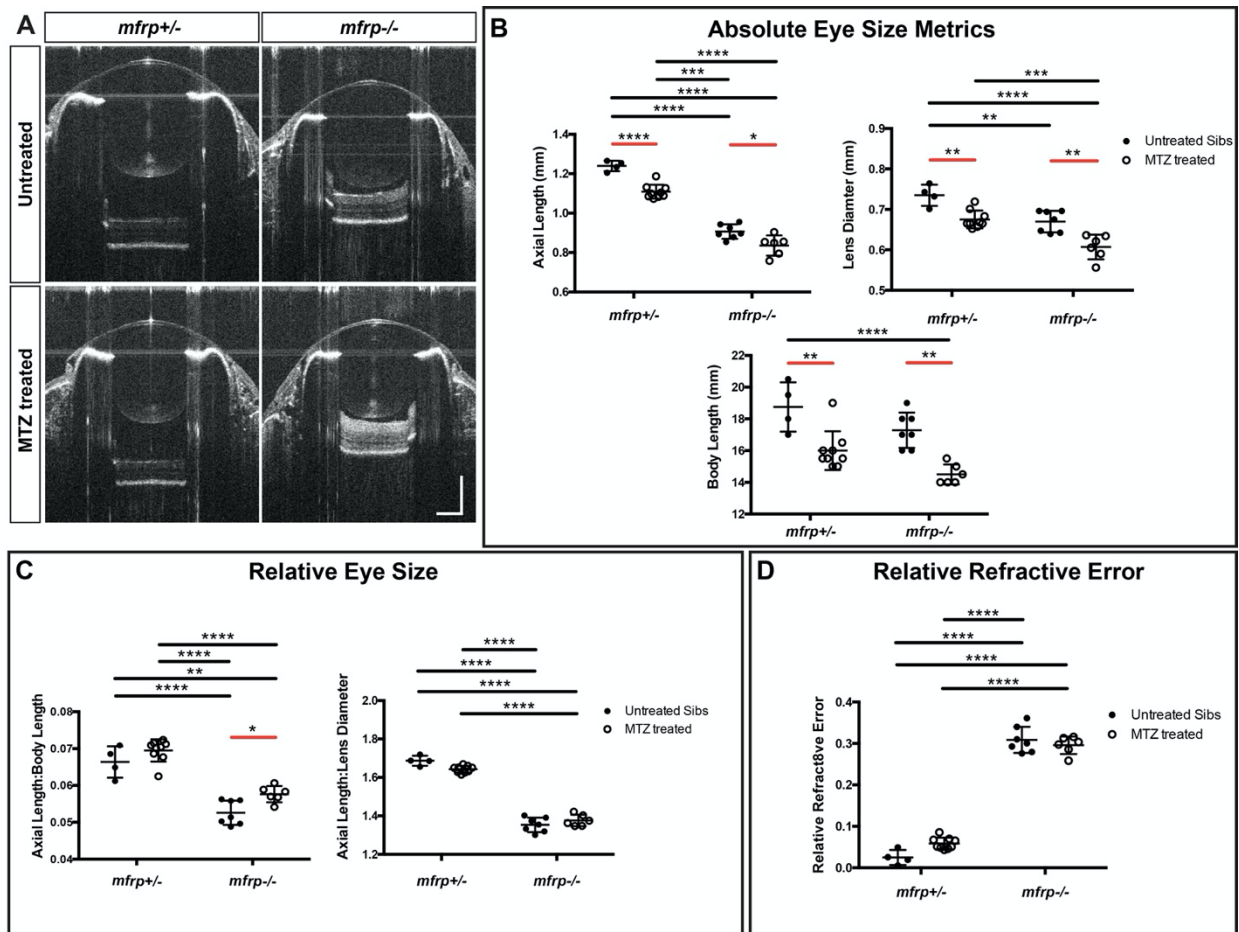

**Figure S2. Nonspecific Effects of MTZ treatment on *mfrp* Eye Metrics. (A)**

Representative SD-OCT B-scans from the center of sibling *mfrp*<sup>+/-</sup> and *mfrp*<sup>-/-</sup> eyes with or without MTZ treatment. **(B)** Eye size metrics of *mfrp*<sup>+/-</sup> and *mfrp*<sup>-/-</sup> fish with or without MTZ treatment. **(C)** Axial length normalized to Body length and Lens diameter. **(D)** Relative Refractive error. 2-way ANOVA was used for statistical analysis with p-values shown from Tukey's multiple comparisons for *post hoc* analysis. Error bars = standard deviation. Red bars indicate statistical significance due to MTZ treatment. \* = p<0.05, \*\* = p<0.01, \*\*\* = p<0.001, \*\*\*\* = p<0.0001.

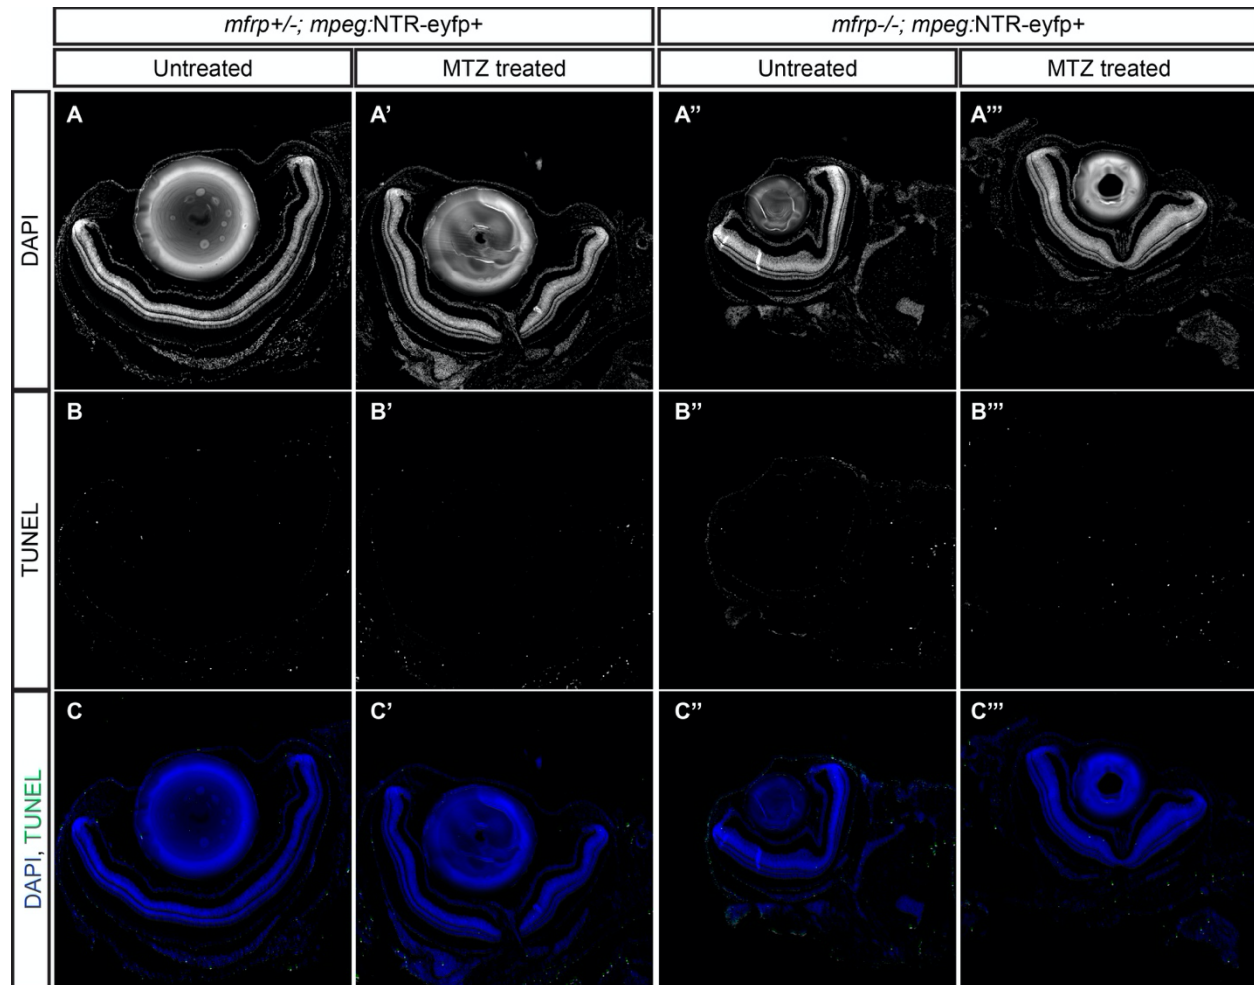

**Figure S3. Macrophage ablation causes no appreciable change in retinal cell death. (A-A''')** Grayscale DAPI images retina sections from *mfrp*<sup>+/-</sup>; *mpeg:NTR-eyfp*<sup>+</sup> and *mfrp*<sup>-/-</sup>; *mpeg:NTR-eyfp*<sup>+</sup> MTZ treated and untreated eyes. **(B-B''')** Grayscale images of TUNEL stained sections from A. **(C-C''')** Colorized merged images with DAPI in blue and TUNEL in green.
